# Supplementary material for: Characterization of a ripening-related transcription factor FcNAC1 from Fragaria chiloensis fruit
Source: PubMed Central journal article supplement (PMC6043618; doi:10.1038/s41598-018-28226-y), 2018-07-12
Supplement: 41598_2018_28226_MOESM1_ESM.pdf [file 41598_2018_28226_MOESM1_ESM.pdf]

**Characterization of a ripening-related transcription factor *FcNAC1* from *Fragaria chiloensis* fruit.**

CARRASCO-ORELLANA, C., STAPPUNG, Y., MENDEZ-YAÑEZ, A., ALLAN, A.C., ESPLEY, R.V., PLUNKETT, B. J., MOYA-LEON, M. A. and HERRERA, R\*

**Supplementary Figures.**

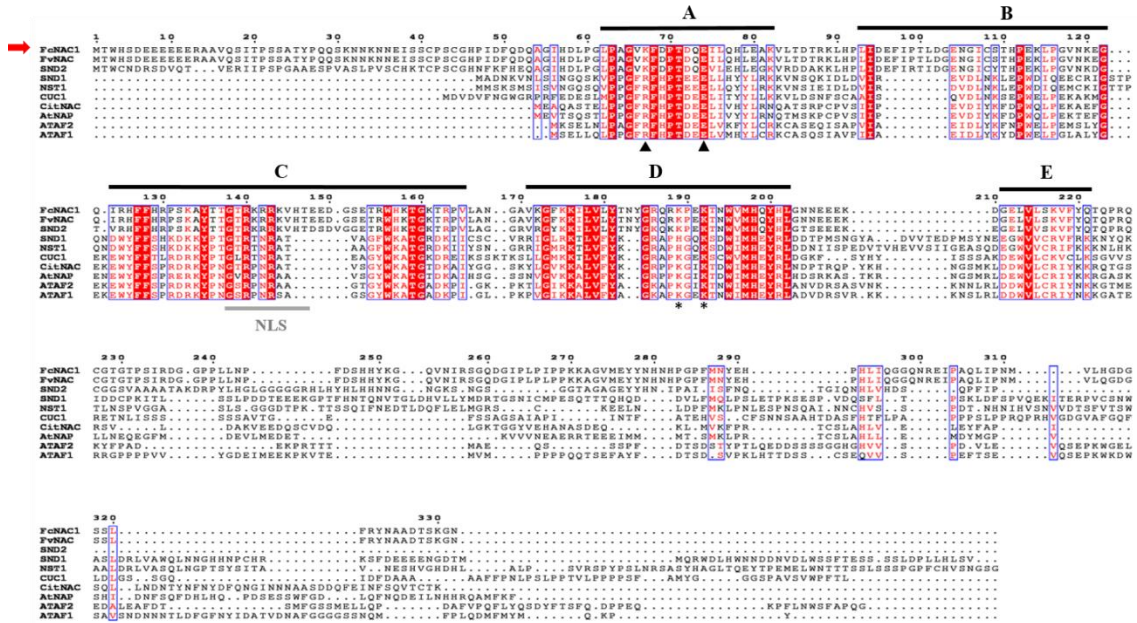

**Supplementary figure 1.** Multiple alignment of FcNAC1 (marked with red arrow) sequence and other NAC family members where the conserved amino acids are marked with white letters and similar residues with red letters. Important residues for homodimerization are marked with triangles and those important for the DNA interaction with asterisks. The nuclear localization signal prediction is labeled in grey color. The alignment of sequences was performed with ESPrift3.0 software (<http://esprift.ibcp.fr/ESPrift/ESPrift/>). The accession numbers of NAC members are: ATAF1 (NM\_100054.3), ATAF2 (NM\_147856.4), AtNAP (NM\_105616.4), CitNAC (EF185419.1), CUC1 (EU550396.1), NST1 (NM\_130243), SND1 (EF101892), and SND2 (NC\_003075.7); FvNAC (XP\_004293895) related to FcNAC1 (AKC96459). The NLS label indicates the nuclear localization signal.

# FcNAC1

| Predicted NLSs in query sequence                            |     |
|-------------------------------------------------------------|-----|
| MTWHSDEEEEEERAAVQSITPSSATYPQQSKNNKNNEISSCPSCGHPIDF          | 50  |
| QDQAGIHDLPLPAGVKFDPTDQEILQHLEAKVLTDRKHLPLIDEFIPT            | 100 |
| LDGENGICSTHPEKLPGVNKEGQIRHFFHRPSKAYTT <b>GTRKRRKVHTE</b> ED | 150 |
| GSETRWHKTGKTRPVLANGAVKGFKKILVLYTNYGRQRKPEKTNWVMHQY          | 200 |
| HLGNNEEEKDGELVLSKVFYQTQPRQC GTGTPSIRDGGPPLLNPFD SHHY        | 250 |
| KGQVNIRSGQDGIPLPIPPKKAGVMEYYNHNHPGPFMNYEHPHLIQGGQN          | 300 |
| REIPAQLIPNMVLHGDGSSLF RYNAADTSKGN                           | 332 |

| Predicted monopartite NLS |             |       |
|---------------------------|-------------|-------|
| Pos.                      | Sequence    | Score |
| 138                       | GTRKRRKVHTE | 9.5   |
| 138                       | GTRKRRKVHT  | 10    |

**Supplementary figure 2.** Nuclear localization signal prediction of FcNAC1 amino acid sequence by NLS Mapper software.

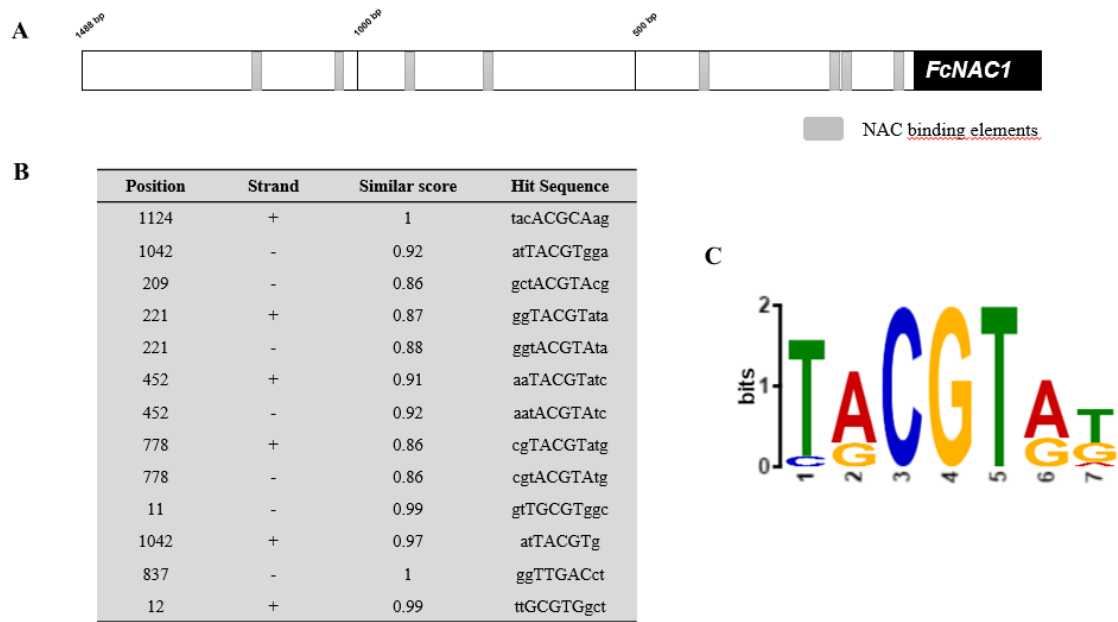

**Supplementary figure 3.** Promoter sequence of the *FcNAC1* gene and *in-silico* analysis of cis-elements related to NAC TF. A) Representation of *FcNAC1* promoter sequence, which was analyzed with the Plant Pan 2.0 database. In color are represented cis-elements of response to interaction with NAC transcription factors. B) Table with the result of the analysis of Plant Pan 2.0, where is possible appreciate the different elements of response to NAC, its sequence and positioning. C) Representative logo of cis elements of the NACBS type made with MEME software.

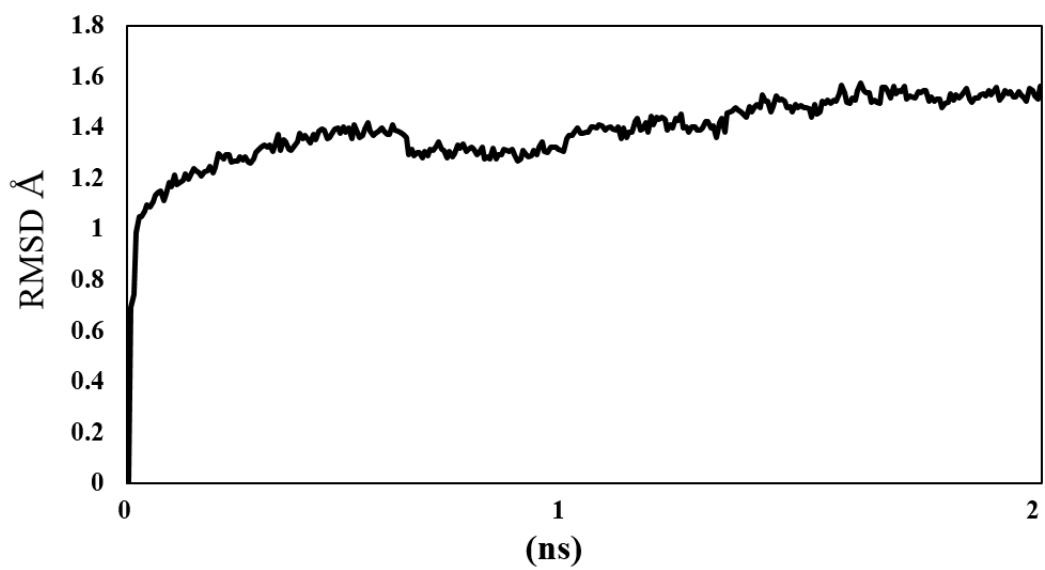

**Supplementary figure 4.** The MD simulation curves of FcNAC1 domain. The RMSD plot calculated for backbone atoms of FcNAC1 monomer domain during its MD simulation (2 nano seconds).

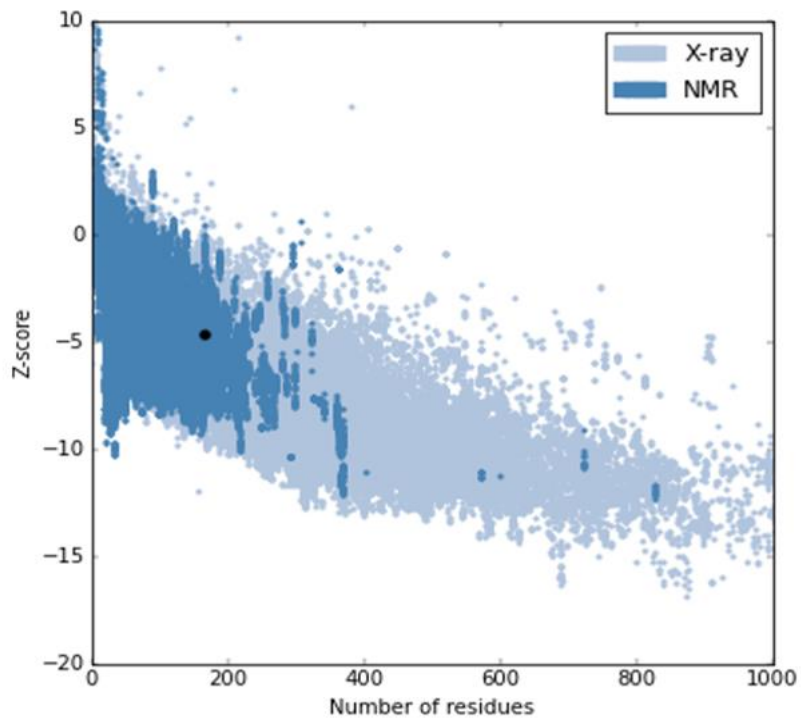

**Supplementary figure 5.** Evaluation of the FcNAC1 monomer domain by Prosa software.
